# Supplementary material
Source: PubMed Central journal article supplement (PMC3773764)
Supplement: 1314681110_pnas.201314681SI.pdf [file 1314681110_pnas.201314681SI.pdf]

# Supporting Information

Nácher et al. 10.1073/pnas.1314681110

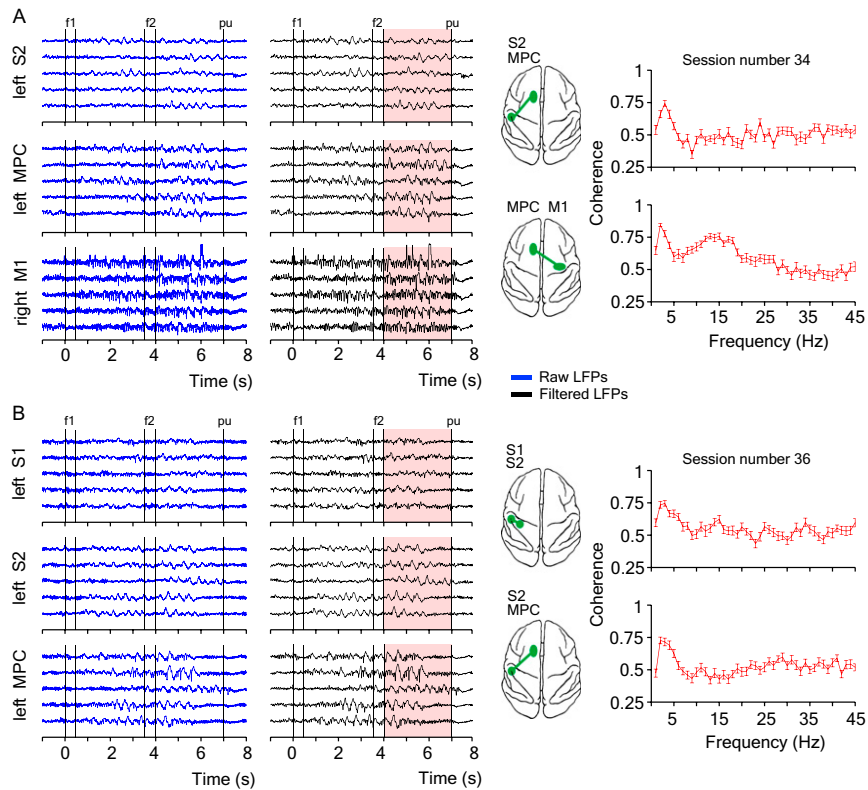

**Fig. S1.** Delta oscillation examples during the delay period between f2 and pu. LFP signals and coherence examples corresponding to session number 34 (A) and session number 36 (B). *Left* shows LFPs signals for three simultaneously recorded areas during the discrimination task. Each row is a trial. Raw LFPs are plotted in blue and filtered in black color. Top views of the monkey brain show the location of the cortical pairs from which coherence is calculated (green spots) during the delay period between f2 and pu (red boxes). Coherence spectra are plotted in *Right* and peaks at 2–3 Hz. SEM ( $\pm 2$ ) over trials at each point is indicated by error bars. S1, primary somatosensory cortex; S2, secondary somatosensory cortex; MPC, medial premotor cortex; and M1, primary motor cortex.
